# Aberrant neurophysiological signaling underlies speech impairments in Parkinson's disease

Alex I. Wiesman<sup>1</sup>, Peter W. Donhauser<sup>1,2</sup>, Clotilde Degroot<sup>1</sup>, Sabrina Diab<sup>3</sup>, Shanna Kousaie<sup>4</sup>, Edward A. Fon<sup>1</sup>, Denise Klein<sup>1\*</sup>, Sylvain Baillet<sup>1\*</sup>, PREVENT-AD Research Group<sup>†</sup>, Quebec Parkinson Network

<sup>1</sup> Montreal Neurological Institute, McGill University, Montreal, Canada

<sup>2</sup> Ernst Strüngmann Institute for Neuroscience, Frankfurt, Germany

<sup>3</sup> Department of Psychology, Université du Québec à Montréal, Canada

<sup>4</sup> School of Psychology, University of Ottawa, Canada

\* Corresponding authors

† Authors contributed equally to this report

## Correspondence:

Sylvain Baillet, PhD

McConnell Brain Imaging Centre

Montreal Neurological Institute

McGill University, Montreal QC

[sylvain.baillet@mcgill.ca](mailto:sylvain.baillet@mcgill.ca)

Denise Klein, PhD

Cognitive Neuroscience Unit

Montreal Neurological Institute

McGill University, Montreal QC

[denise.klein@mcgill.ca](mailto:denise.klein@mcgill.ca)

---

<sup>‡</sup>Data used in preparation of this article were obtained from the Pre-symptomatic Evaluation of Novel or Experimental Treatments for Alzheimer's Disease (PREVENT-AD) program (<https://douglas.research.mcgill.ca/stop-ad-centre>), data release 6.0. A complete listing of PREVENT-AD Research Group can be found in the PREVENT-AD database: [https://preventad.loris.ca/acknowledgements/acknowledgements.php?date=\[2022-02-01\]](https://preventad.loris.ca/acknowledgements/acknowledgements.php?date=[2022-02-01]). The investigators of the PREVENT-AD program contributed to the design and implementation of PREVENT-AD and/or provided data but did not participate in analysis or writing of this report.

1 **Abstract**

2  
3 Difficulty producing intelligible speech is a common and debilitating symptom of Parkinson’s disease (PD).  
4 Yet, both the robust evaluation of speech impairments and the identification of the affected brain systems  
5 are challenging. We examine the spectral and spatial definitions of the functional neuropathology  
6 underlying reduced speech quality in patients with PD using a new approach to characterize speech  
7 impairments and a novel brain-imaging marker. We found that the interactive scoring of speech  
8 impairments in PD (N=59) is reliable across non-expert raters, and better related to the hallmark motor and  
9 cognitive impairments of PD than automatically-extracted acoustical features. By relating these speech  
10 impairment ratings to neurophysiological deviations from healthy adults (N=65), we show that articulation  
11 impairments in patients with PD are robustly predicted from aberrant activity in the left inferior frontal  
12 cortex, and that functional connectivity of this region with somatomotor cortices mediates the influence of  
13 cognitive decline on speech deficits.

14 **Keywords**

15 Parkinson’s disease, neural oscillations, movement disorders, articulation impairments, dysarthria,  
16 Spectral Deviation Index

1 Parkinson's disease (PD) is the second most common neurodegenerative disorder worldwide<sup>1</sup>, and is  
2 characterized by progressive declines in motor function and cognition. Difficulties producing intelligible  
3 speech are some of the earliest<sup>2-4</sup> and most debilitating<sup>5,6</sup> impairments of PD. Speech production is  
4 inherently complex, and speech symptoms in patients with PD are multidimensional<sup>7</sup>; they commonly  
5 include hoarse *voice*, imprecise *articulation*, and monotonous *prosody*<sup>4,8</sup>. However, the best approach to  
6 quantifying pathological changes in speech remains unclear. On the one hand, evaluation of dysarthric  
7 symptoms by a certified speech-language pathologist using clinical scales is time-consuming but often  
8 regarded as the gold standard. On the other, more rapid and inexpensive assessments based on  
9 automatically-extracted acoustical measures<sup>4,9,10</sup> are promising, but may not provide a sufficiently nuanced  
10 representation of the disease symptomatology. The optimal outcome of remediation speech therapies in  
11 PD is improved intelligibility to human listeners, hence the value of human assessment of speech  
12 impairments as an alternative. Human ratings of speech impairments in PD are highly reliable across  
13 raters<sup>11-13</sup>, time points<sup>14</sup>, and levels of rater expertise<sup>13</sup>, and can contribute to predicting disease  
14 progression<sup>12</sup> and therapeutic outcomes<sup>14</sup> beyond simpler acoustical metrics.

15 Beyond the robust qualification of speech impairments in PD, their neurophysiological origins are also  
16 unknown. In the healthy brain, speech production engages a distributed and predominantly left-lateralized  
17 ensemble of cortical regions including the primary motor, primary auditory, pre-motor, posterior parietal  
18 and inferior frontal cortices<sup>15-21</sup>. Temporally, cued speech production requires the integration of incoming  
19 phonological information in the left superior temporal cortex, which precedes and then overlaps with  
20 sustained motor processing in the precentral gyrus, followed by engagement of left inferior frontal cortex  
21 (LIFC) for metrical encoding of speech production, and the left middle and superior frontal cortices for  
22 voluntary control of motor initiation<sup>18,22-25</sup>. The frequency-specific (spectral) components of  
23 neurophysiological activity related to speech production have also been studied extensively<sup>26,27</sup>. They  
24 include a key role for alpha (~7–13 Hz) and beta (~15–30 Hz) frequency bands in speech-network regions,  
25 and slower delta band (~2-4 Hz) activity in prefrontal regions<sup>28,29</sup>, for effective production of speech<sup>28,30-35</sup>.  
26 Interregional beta-band functional connectivity between prefrontal, auditory, and motor cortices is also  
27 essential for healthy speech production<sup>28,36</sup>.

28 Functional neuroimaging studies of patients with PD have shown that speech production recruits greater  
29 cerebral blood flow and oxygenation across prefrontal, auditory, and motor regions<sup>37-40</sup> than in healthy  
30 controls, and that this hypermetabolism is normalized by common PD therapies<sup>37,38</sup>. Inter-regional  
31 connectivity of the speech circuit also appears to impact speech production in PD<sup>41,42</sup>, with opposing effects  
32 of decreased versus increased functional connectivity during speech preparation and production,  
33 respectively<sup>43</sup>. The neurophysiological spectrum of these effects is less studied; a limited literature suggests  
34 decreased beta oscillations in the subthalamic nucleus<sup>44</sup> and primary motor cortex<sup>45</sup> in PD patients during  
35 active speech. Importantly, it remains relatively unclear to what extent these patterns of aberrant neural  
36 activity during active speech production under highly controlled experimental conditions relate to the real-  
37 world difficulties experienced by patients with PD. Given the key role of rhythmic neural activity in motor  
38 and cognitive impairments in patients with PD<sup>46-48</sup>, and the proven and future potential for therapeutic  
39 interventions based on frequency-specific neurostimulation in this population<sup>49-51</sup>, a clearer understanding  
40 of the spatio-spectral neural bases of speech intelligibility deficits in PD is essential.

41 In this study, we examine the spectral and spatial definitions of the functional neuropathology underlying  
42 reduced speech quality in patients with PD (N = 59). Towards this goal, we first quantified patient speech  
43 impairments with a novel interactive tool designed for non-specialists, and show that this approach

1 outperforms measures based on the automatic extraction of acoustical features. We then introduce a new  
2 brain mapping technique of spectral neurophysiological deviations (the Spectral Deviation Index; SDI)  
3 between each patient and a group of demographically-matched healthy controls (N = 65). We hypothesized  
4 that aberrant neurophysiological manifestations would map to brain regions known for their involvement  
5 in speech production, and scale with the severity of speech impairments in patients with PD. We also  
6 anticipated that neurophysiological connectivity across the brain circuit for speech production would also  
7 be altered in those patients with more pronounced speech difficulties.

## 1 Results

2  
3  
4

### Demographics, clinical assessments, and speech impairments in patients with PD

5 Demographics for both groups, as well as clinical features for the PD group, are reported in Table 1. Speech  
6 quality assessments were consistent across raters for all assessed features: voice (intra-class correlation  
7 coefficient [ICC] = .89, 95% CI = [.83 .93]), articulation (ICC = .88, 95% CI = [.81 .92]), and prosody (ICC = .78,  
8 95% CI = [.66 .86]; Fig. 1A). These speech impairment ratings were also related to clinical features of PD  
9 (Fig. 1B): they were all significantly predicted by clinical motor function (UPDRS-III, minus speech sub-  
10 scores; voice:  $t(51) = 2.82, p = .007$ ; articulation:  $t(51) = 3.61, p < .001$ ; prosody:  $t(51) = 3.07, p = .003$ ), such  
11 that greater non-speech motor impairment predicted greater speech difficulties. We found weaker  
12 associations between all three speech features and PD staging (Hoehn & Yahr scale; voice:  $t(45) = 2.05, p =$   
13  $.046$ ; articulation:  $t(45) = 2.07, p = .044$ ; prosody:  $t(45) = 2.05, p = .046$ ; all uncorrected for multiple  
14 comparisons). Only articulation impairments were predicted by patient cognitive abilities (MoCA scores;  
15 voice:  $t(56) = -0.47, p = .639$ ; articulation:  $t(51) = -2.85, p = .006$ ; prosody:  $t(51) = -1.15, p = .250$ ), such that  
16 greater cognitive impairment was associated with greater articulation difficulties. Further, models including  
17 these speech ratings predicted non-speech motor dysfunction ( $\Delta AIC = -6.69$ ) and cognitive function ( $\Delta AIC$

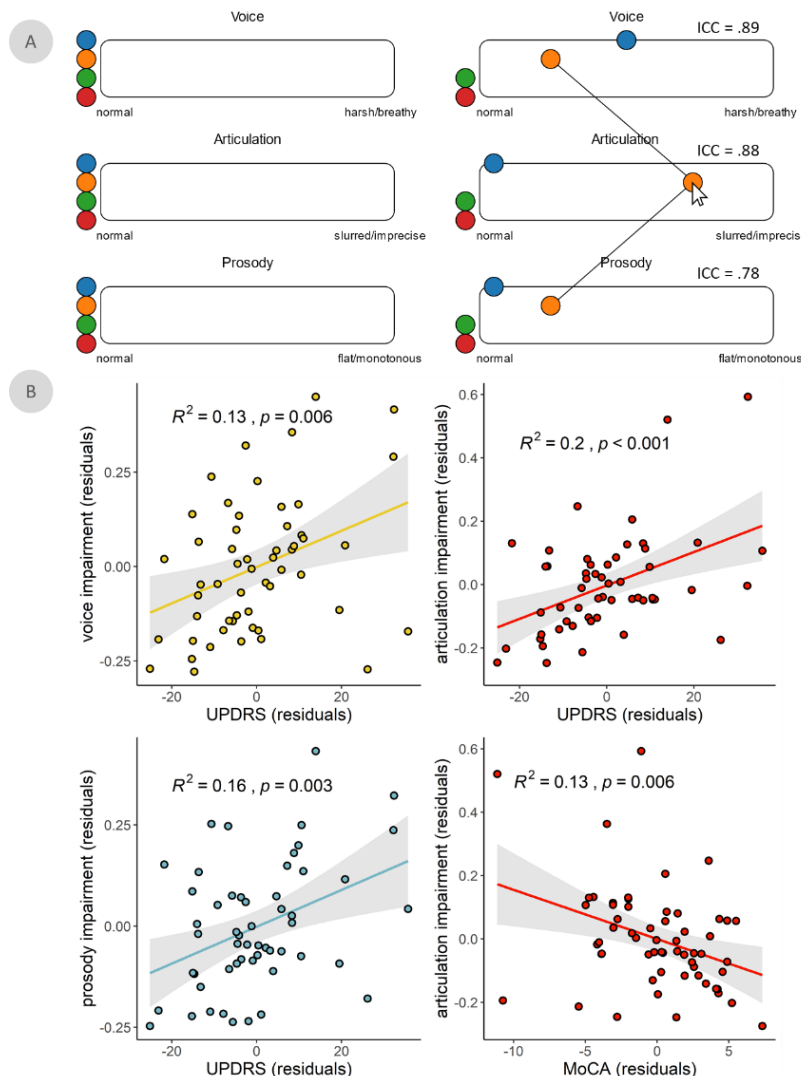

**Figure 1. Speech impairment ratings are reliable and predicted by clinical features of PD.** (A) Graphical user interface for the manual rating of speech feature impairments using *Audio-Tokens*. When hovered-over with the mouse, colored circles play speech samples from separate patients with Parkinson’s disease, allowing for interactive and comparative rating (i.e., by clicking and sliding the circles horizontally) of impairments in each speech feature. Intraclass correlation coefficients (ICC) indicate reliability of speech ratings across three independent raters. (B) Significant linear relationships between voice, articulation, and prosody impairments and two common clinical scales in Parkinson’s disease: the Unified Parkinson’s Disease Rating Scale part III (i.e., UPDRS-III, minus speech sub-scores) and the Montreal Cognitive Assessment (MoCA). All models controlled for age. Shaded intervals represent the 95% confidence interval.

1 = -9.03) better than acoustical features extracted automatically from the same recordings. All three  
 2 features also significantly predicted speech impairment ratings made by a trained clinician (UPDRS-III  
 3 speech sub-score; voice:  $t(51) = 5.17, p < .001$ ; articulation:  $t(51) = 3.51, p < .001$ ; prosody:  $t(51) = 4.49, p$   
 4  $< .001$ ; Fig. S1).

5  
 6 *Spectral pathology is related to articulation impairments in PD*

7  
 8 The average of individual SDI maps (Fig. 2A) across all patients emphasized spectral deviations in premotor,  
 9 primary somatomotor, and superior parietal cortices bilaterally (Fig. 2B). The greatest variability of SDI  
 10 across patients was found in the bilateral prefrontal and temporal cortices (Fig. 2C).

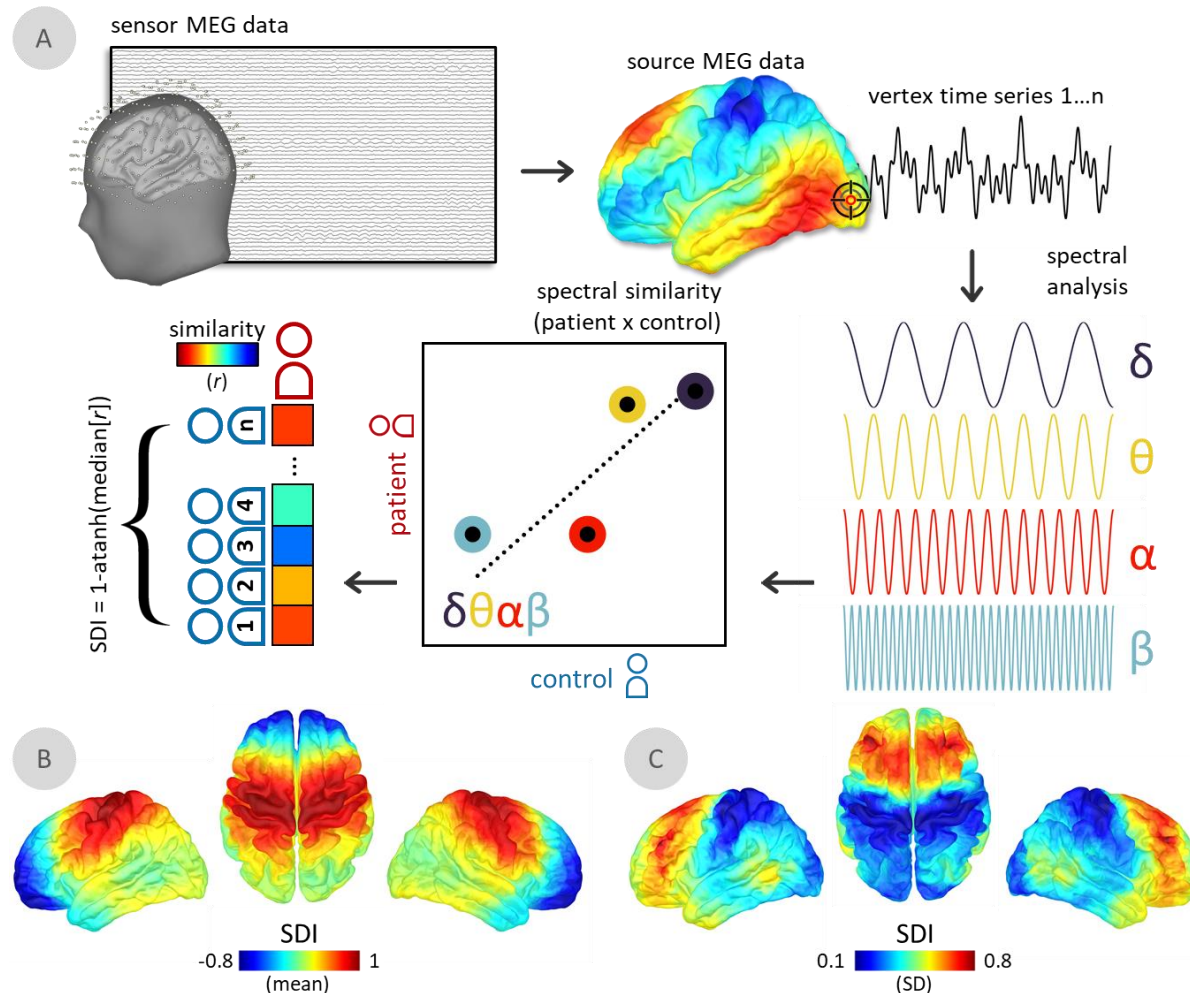

**Figure 2. The Spectral Deviation Index (SDI).** (A) For all participants, magnetoencephalography (MEG) data were cortically mapped, frequency-transformed, and averaged over canonical frequency bands (i.e.,  $\delta$ : 2 – 4 Hz;  $\theta$ : 4 – 7 Hz;  $\alpha$ : 8 – 12 Hz;  $\beta$ : 15 – 29 Hz). Pearson correlation coefficients were then estimated at each vertex, representing the similarity in frequency-wise power between each patient and control. For each patient, the median of these values was taken over all comparisons to control participants, which was then Fisher-transformed to ensure linear scaling (i.e., transformed with the inverse hyperbolic tangent function) and subtracted from 1 to indicate relative deviations from the control group. Surface maps below indicate the mean (B) and standard deviation (C) of the spectral deviation maps across all patients with Parkinson’s disease.

1 We performed a multiple regression of these maps on all three speech features, and found that articulation  
 2 impairments uniquely predicted spectral pathology in the LIFC (TFCE;  $p_{FWE} = .027$ ; peak vertex = x: -51, y:  
 3 36, z: 2; Fig. 3A), with greater LIFC deviations associated with greater speech impairment (Fig. 3B). Neural  
 4 activity in all tested frequency bands (from delta to beta) contributed to this effect ( $\Delta AIC$ ; delta = 10.56;  
 5 theta = 2.86; alpha = 9.74; beta = 3.80; Fig. 3C), with the strongest influences from the delta and alpha  
 6 bands. Post-hoc analysis of frequency-specific relationships suggested that preserved speech function was  
 7 related to slowing of neural activity in the LIFC: greater impairment was associated with increased activity  
 8 in the faster (alpha & beta) and decreased activity in the slower (delta & theta) frequency bands (Fig. 3D).  
 9 SDI values in the LIFC did not significantly relate to clinical motor function (UPDRS-III, minus speech sub-  
 10 scores;  $t(51) = 1.54$ ,  $p = .130$ ) or MoCA ( $t(56) = -0.25$ ,  $p = .807$ ) scores. The relationship between cross-  
 11 spectral pathology and articulation impairment remained significant ( $p = .001$ ) when potential confounds  
 12 were added to the model, including head motion ( $p = .403$ ), eye movements ( $p = .242$ ), cardiac artifacts ( $p$   
 13 = .770), local cortical thickness ( $p = .717$ ), and local aperiodic slope ( $p = .666$ ).

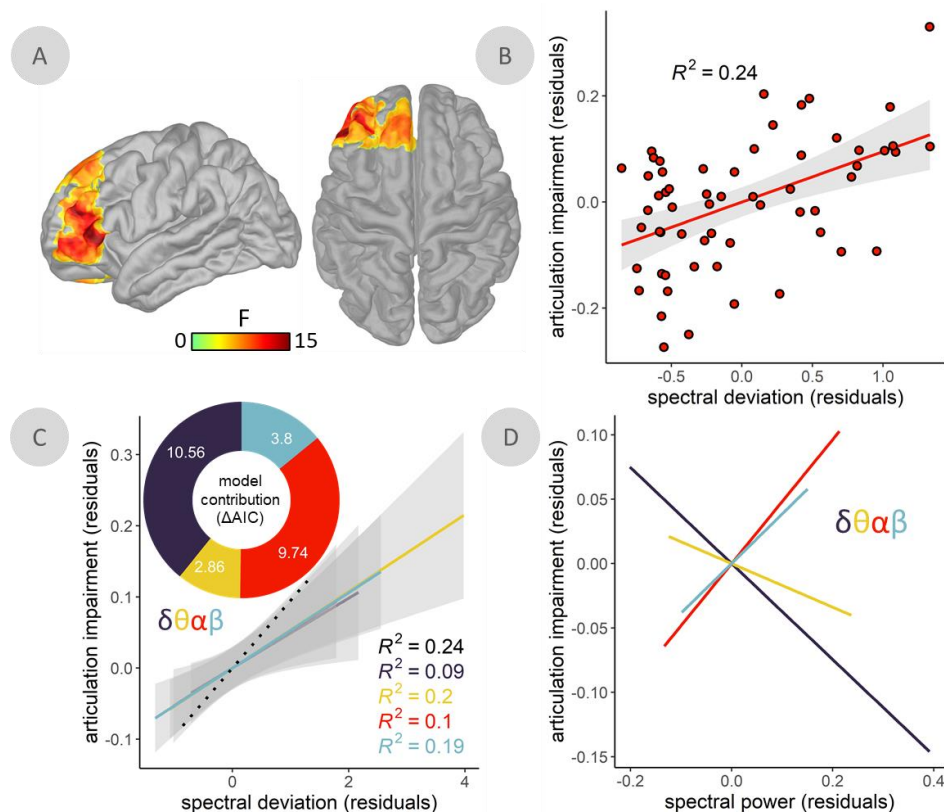

**Figure 3. Spectral deviation predicts articulatory impairments in the left inferior frontal cortex.** (A) Surface maps indicate a significant relationship between spectral deviations and articulation impairments in patients with Parkinson's disease (PD), with spectral deviations (SDI) and articulation impairment ratings from the peak vertex of this relationship plotted in (B). (C) Model contribution values shown in the donut plot indicate comparisons between models predicting articulation impairment ratings using the SDI values from the same peak vertex and comparable SDI values computed with each frequency left out once. More positive differences in Akaike information criterion ( $\Delta AIC$ ) indicate a stronger contribution of that frequency to the overall model, with  $\Delta AIC > 2$  signifying meaningful differences in model information. Best fit lines represent the linear relationships between these leave-one-out models for each frequency and the articulation impairment ratings across patients with PD. (D) Lines-of-best-fit indicate the direction of the underlying relationships between spectral power at each frequency and articulation impairment ratings. All models controlled for age. Shaded intervals represent the 95% confidence interval.

1 *LIFC-somatomotor beta-frequency connectivity mediates cognitive contributions to articulation*  
 2 *impairments in PD*

3  
 4 We computed whole-cortex frequency-specific connectivity maps to examine whether signal similarities  
 5 between the LIFC and the rest of the cortex were related to speech impairments in PD. The connectivity  
 6 analyses were seeded at the vertex location corresponding to the peak of the SDI-articulation impairment  
 7 statistical map (x: -51, y: 36, z: 2). We found that articulation impairment predicted connectivity between  
 8 LIFC and a distributed network of pre-motor, anterior cingulate, and somatomotor regions in the beta band,  
 9 above and beyond the effects of age, prosody impairments, and voice impairments (TFCE;  $p_{FWE} < .001$ ; peak  
 10 vertex = x: -11, y: -12, z: 46; Fig. 4A). This relationship was such that patients with weaker LIFC-somatomotor  
 11 functional connectivity exhibited worse articulation impairments (Fig. 4B, left). Further, this shared variance  
 12 was independent of SDI effects in the LIFC, as both LIFC SDI values ( $t(56) = 4.28, p < .001$ ) and beta LIFC-  
 13 somatomotor connectivity ( $t(56) = -5.66, p < .001$ ) each significantly predicted articulation impairment,  
 14 above and beyond the other, when included in a single linear model. Beta LIFC-somatomotor functional  
 15 connectivity did not relate to UPDRS III scores, but did significantly covary with MoCA scores ( $t(56) = 2.98,$   
 16  $p = .004$ ; Fig. 4B, right), such that stronger connectivity predicted better cognitive function. The relationship  
 17 between MoCA scores and articulation impairment was also fully mediated by beta-band connectivity  
 18 (causal mediation analysis, 10,000 simulations; Fig. 4C), as indicated by a significant indirect effect (average  
 19 causal mediation effect =  $-.005, p = .024$ ) and a non-significant direct effect (average direct effect =  $-.011,$   
 20  $p = .223$ ) upon addition of connectivity values to the linear model. The relationship between beta LIFC-  
 21 somatomotor connectivity and articulation impairment remained significant ( $p < .001$ ) when potential  
 22 confounds were added to the model, including head motion ( $p = .750$ ), eye movement ( $p = .451$ ), and  
 23 cardiac artifacts ( $p = .771$ ).

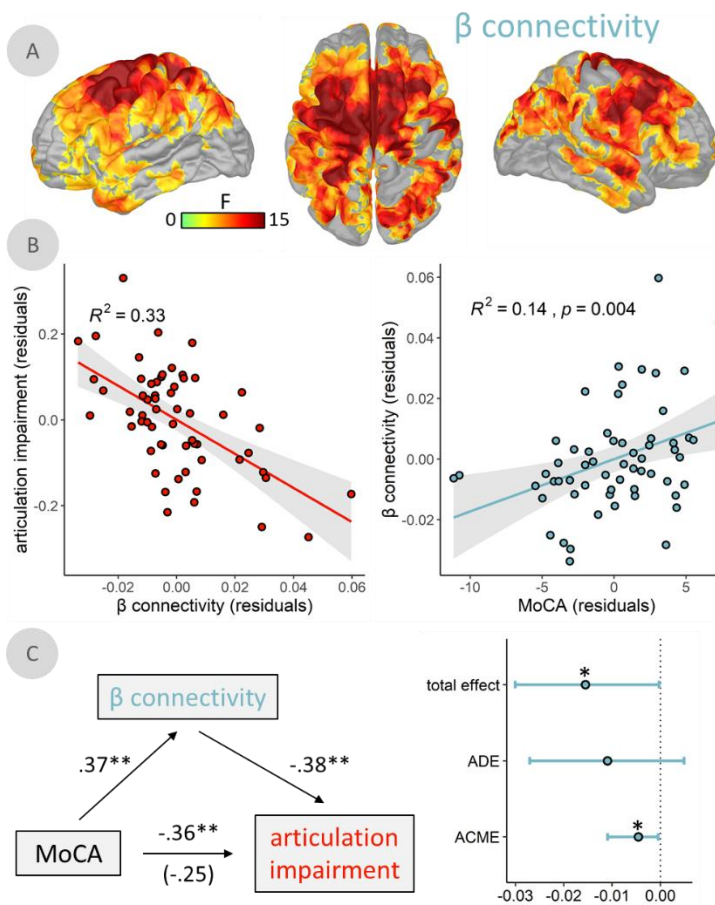

**Figure 4.  $\beta$ -frequency functional connectivity between left inferior frontal cortex and somatomotor regions mediates the impact of cognitive decline on articulation impairments.** (A) Surface maps indicate a significant relationship between articulation impairment ratings and frequency-resolved functional connectivity, computed using orthogonalized amplitude envelope correlations (AEC) with the peak vertex of the relationship from Figure 3 as the seed. (B)  $\beta$ -connectivity and articulation impairments from the peak vertex of this relationship are plotted on the left, and the relationship between the same  $\beta$ -connectivity values and cognitive function (i.e., Montreal Cognitive Assessment [MoCA] scores) plotted on the right. (C) Paths between MoCA scores, articulation impairment ratings, and  $\beta$ -connectivity values to the left indicate partial correlations ( $r$ ) between each set of variables. The correlation value in parentheses represents the mediated relationship between MoCA scores and articulation impairment ratings when accounting for  $\beta$ -connectivity. The total effect, average direct effect (ADE), and average causal mediation effect (ACME; i.e., indirect effect) are plotted with 95% confidence intervals to the right. All models controlled for age. Shaded intervals represent the 95% confidence interval. \*\* $p < .01$ , \* $p < .05$ .



## 1 Discussion

2  
3 This study introduces and combines novel approaches to spectral brain mapping and speech impairment  
4 quantification to delineate the functional neural pathology contributing to speech impairment in PD. We  
5 identify in a large group of patients with PD a pathological relationship between articulation impairments  
6 and spectral deviations in the LIFC, with strongest contributions from neurophysiological activity in the  
7 delta and alpha bands. In healthy adults, the LIFC is a hub that exhibits multi-frequency interactions with a  
8 number of language network regions<sup>29</sup>. Our data also showed that neurophysiological connectivity  
9 between LIFC and a network of somatomotor cortices in the beta band independently predicted  
10 articulation impairments, and fully mediated the effect of cognitive abilities on these impairments.  
11 Together, these results provide a spatially- and spectrally-resolved cortical network underlying articulatory  
12 impairments in PD. These findings may be of significance to future biomarker research and therapeutic  
13 targeting in PD. We also anticipate that the new, individualized modeling approach of spectral brain  
14 pathology for each patient may translate and be meaningful to other clinical populations.

15  
16 Our approach to speech impairment quantification is predicated on the notion that clinical endpoints for  
17 speech production studies in PD need to improve speech perception by human raters<sup>11-13,52,53</sup>. One novel  
18 contribution of the present study is rating of speech features from non-experts through an intuitive and  
19 interactive app (*Audio-Tokens*)<sup>54</sup>, that facilitates simultaneous comparison of speech samples from multiple  
20 study participants. Despite being obtained from non-experts, the ratings exhibited a degree of inter-rater  
21 reliability comparable to those from gold-standard procedures in the field, such as speech intelligibility  
22 quantification using transcription<sup>53</sup>. The *Audio-Tokens* ratings predicted both non-speech motor features  
23 (i.e., UPDRS-III with speech sub-scores subtracted) and cognitive function (i.e., MoCA scores) more  
24 effectively than common acoustical features derived from automated methods. The *Audio-Tokens* ratings  
25 obtained remotely from non-experts were also similar to the assessments performed in the clinic by a  
26 trained professional (i.e., the speech sub-score of the UPDRS-III). We believe these findings establish the  
27 potential utility of the *Audio-Tokens* approach in patients with PD, particularly since comparable speech  
28 samples can be easily collected and rated without in-person visits to the clinic. The significance is that of  
29 tele-medical, longitudinal patient evaluations. A thorough comparison to more advanced automated  
30 speech quality quantification procedures (e.g., based on machine-learning techniques)<sup>55</sup> remains  
31 warranted, albeit beyond the scope of this study. If these comparisons favor our approach, the additional  
32 predictive clinical power of human speech ratings can be harnessed to improve automated speech  
33 extraction methods, which in turn can alleviate the costs of and limited access to movement disorder  
34 specialists.

35  
36 By relating speech impairments to spectral deviations from healthy neurophysiological activity, we  
37 identified that the greater the spectral deviations in LIFC, the more pronounced the articulation deficits in  
38 patients with PD. The LIFC is a key node of the speech production network<sup>15-17,56</sup> associated to the metrical  
39 encoding of to-be-produced speech representations<sup>56,57</sup>. Previous research<sup>58,59</sup> also suggests that the  
40 anterior location of this effect along the inferior frontal gyrus might indicate a deficit in the semantic and/or  
41 lexical aspects of articulatory functions in PD. Further, the slower range of neurophysiological activity  
42 involved (delta & theta frequency bands) is associated to temporal expectation and parsing mechanisms of  
43 sensory inputs<sup>27,60-63</sup>. We interpret these observations as PD patients experiencing difficulties producing  
44 clear and precise speech sounds because of impaired mechanisms for parsing and rhythmically encoding  
45 phonological information prior to speech motor initiation. We also found that increased expressions of  
46 faster frequencies (alpha & beta frequency bands) in LIFC predicted speech deficits. Strong alpha/beta  
47 activity in the parieto-occipital<sup>64,65</sup> and somatomotor<sup>66-68</sup> cortices reflects enhanced functional local

1 inhibition. Additionally, alpha/beta activity in LIFC is reduced around speech preparation<sup>34,69,70</sup>. Taken  
2 together, we interpret our findings as indicative that patients with reduced inhibition of LIFC at rest  
3 exhibited the best articulation abilities, possibly because of greater ability to parse speech information in  
4 time. Overall, these effects involve at once several components of the neurophysiological frequency  
5 spectrum in a single brain region, highlighting the utility of the proposed spectral deviation approach.  
6

7 In contrast to the multi-spectral and spatially-focal nature of speech-related neural pathology in the LIFC,  
8 the network-level connectivity patterns that predicted articulation abilities in patients with PD were limited  
9 to the beta-band and spatially-widespread. Our data show that beta-band functional connectivity between  
10 the LIFC and prefrontal, frontal, and parietal somatomotor regions was negatively associated with speech  
11 impairments in patients. Substantial structural and functional connectivity effects have been reported  
12 between these regions<sup>71,72</sup>, and functional connectivity between LIFC and superior frontal regions during  
13 speech comprehension is reduced in PD<sup>73,74</sup>. Previous studies have also reported increased beta  
14 connectivity in patients with PD<sup>47</sup>, with indications of clinical significance, although it is still unclear if the  
15 relationship is one of pathology<sup>75,76</sup> or compensation<sup>77-80</sup>. Our results point at a possible compensation role  
16 for beta-band connectivity in speech production: in the tested patient cohort, the stronger the LIFC-  
17 somatomotor beta connectivity, the higher the cognitive and articulation abilities. This effect was  
18 statistically independent of the spectral deviations we observed in LIFC, which indicates that both effects  
19 represent distinct PD functional pathologies of the speech production brain systems. We hope that these  
20 findings can inspire future research of individualized clinical monitoring and interventions via, for example,  
21 non-invasive therapeutic neuromodulation. We also found that the strength of connectivity effects  
22 mediated the relationship between cognitive abilities (MoCA scores) and articulation impairments.  
23 However, we did not observe such an effect between motor impairments and speech deficits. Our  
24 interpretation is that reduced beta-band connectivity between LIFC and somatomotor cortices is a  
25 biological proxy for cognitive contributions to articulation deficits in PD.  
26

27 In sum, we believe our data advance the understanding of basic mechanisms involved in speech production  
28 in health and disease. They also highlight two new dissociable neurophysiological markers of symptom-  
29 specific clinical decline in PD, which improve the targeting of non-invasive neuromodulatory therapies in  
30 PD<sup>49,51</sup>. Further, the principle of the SDI is generalizable to other neurological and/or psychiatric disorders.  
31 In particular, the combination of easily administered speech sample recordings with a short resting state  
32 MEG has potential for identifying biomarkers in a host of neurodegenerative and neurodevelopmental  
33 disorders, many of which have speech impairment as a presenting complaint.

## 1 Methods

### 3 *Participants*

5 The Research Ethics Board at the Montreal Neurological Institute reviewed and approved this study.  
6 Written informed consent was obtained from every participant following detailed description of the study,  
7 and all research protocols complied with the Declaration of Helsinki. Exclusionary criteria for all participants  
8 included current neurological (other than PD) or psychiatric disorder; MEG contraindications; and unusable  
9 MEG, speech sample, or demographic data. All participants completed the same speech and MEG protocols  
10 with the same instruments at the same site.

11  
12 Patients with mild to moderate idiopathic PD were enrolled as a part of the Quebec Parkinson Network  
13 (QPN; <https://rpq-qpn.ca/>)<sup>81</sup> initiative, which includes extensive clinical, neuroimaging, neuropsychological,  
14 and biological profiling for each participant. A final sample of 59 participants with PD fulfilled the criteria of  
15 having complete and useable MEG, speech sample, and demographic data. All patients with PD were  
16 prescribed a stable dosage of antiparkinsonian medication with satisfactory clinical response prior to study  
17 enrollment. Patients were instructed to take their medication as prescribed before research visits, and thus  
18 all data were collected in the practically-defined “ON” state. The motor subtest of the Unified Parkinson’s  
19 Disease Rating Scale (UPDRS-III)<sup>82</sup> and Montreal Cognitive Assessment (MoCA)<sup>83</sup> were administered to all  
20 participants. We also computed all relationships between motor pathology and speech feature ratings with  
21 the clinical speech sub-score (UPDRS-III, item 1; sub-scores available for N = 54) subtracted from the  
22 UPDRS-III scores to avoid bias. Additional clinical data were also available for subsamples of the patient  
23 group in the form of the Hoehn & Yahr scale (N = 48) and disease duration (i.e., time since diagnosis; N =  
24 56).

25  
26 Neuroimaging data from 65 healthy older adults were collated from the PREVENT-AD (N = 50)<sup>84</sup> and OMEGA  
27 (N = 15)<sup>85</sup> data repositories to serve as a comparison group for the patients with PD. These participants  
28 were selected so that their demographic characteristics, including age (Mann-Whitney U test;  $W = 1551.50$ ,  
29  $p = .067$ ), self-reported sex (chi-squared test;  $\chi^2 = 0.61$ ,  $p = .434$ ), handedness (chi-squared test;  $\chi^2 = 0.29$ ,  
30  $p = .863$ ), and highest level of education (Mann-Whitney U test;  $W = 1831.50$ ,  $p = .615$ ), did not significantly  
31 differ from those of the patient group. Group demographic summary statistics and comparisons, as well as  
32 clinical summary statistics for the patient group, can be found in Table 1.

### 35 *Speech Sample Collection, Rating & Processing*

36  
37 Four auditory speech samples of cued sentence repetitions were recorded from each patient by the same  
38 neuropsychologist. Participants were fluent in French and/or English, and were allowed to hear and speak  
39 the sentences for repetition in the language of their choice (French: N = 51; English: N = 8). Speech samples  
40 were recorded an average of 19.63 days (SD = 53.44) from the date of neuroimaging data collection. All  
41 patients repeated four sentences (two easy, two hard) in the same order (see *Supplemental Materials:*  
42 *Sentence Repetitions*). Sentences were taken from an in-house neuropsychological battery at the Montreal  
43 Neurological Institute, and were matched for difficulty and length. Sentences were pre-recorded by a  
44 female native speaker of each language and played to the participants at test time. Speech samples were  
45 recorded from participants using a Shure SM10ACN Cardioid Dynamic head-worn microphone. The  
46 microphone was positioned such that it was comfortable for the participants to wear, approximately at a

1 two-finger distance to the participant's mouth. Recordings were performed using a Tascam DR-10L Digital  
2 Audio Recorder.

3  
4 The speech features of the recordings were then quantified in two ways: (1) using an automated extraction  
5 approach<sup>4,86</sup>, and (2) using the new Javascript toolbox *Audio-Tokens*<sup>54</sup> to collect speech impairment ratings  
6 from non-experts. The automated extraction approach quantified the following features of the speech data  
7 using Praat<sup>87</sup> with the *Python-parselmouth* interface<sup>88</sup>: harmonics-to-noise ratio (hnr), timing and  
8 amplitude fluctuations of glottal pulses (jitter and shimmer, respectively), standard deviation of pitch  
9 measured over voiced segments (f0\_std), and a proxy for vowel space (area), namely the product of the  
10 inter-quartile range of F1 and F2 values measured over voiced segments (as a simplified version of the  
11 procedure described in Sandoval et al.<sup>86</sup>). To derive a single measure roughly representing voice quality  
12 from these features, the first principal component was extracted from the hnr, jitter, and shimmer features.  
13 The resulting metric, f0\_std, and area were used in further analyses.

14  
15 For the non-expert ratings of the speech samples, three individuals with little-to-no experience in speech  
16 analysis each rated multiple features of every sample on a continuous scale, including the magnitude of  
17 impairments in voice (instruction: "*Does the speaker's voice sound harsh or breathy?*"), articulation  
18 (instruction: "*Is the speaker's articulation slurred or imprecise?*"), and prosody (instruction: "*Does the*  
19 *speech sound flat or monotonous?*"). Sample ratings were performed in the *Audio-Tokens* toolbox<sup>54</sup> (Fig.  
20 1A), which allowed for interactive and dynamic comparison of speech samples across patients. The  
21 resulting values were then averaged across the 4 sentences for each speech feature/rater/patient, and the  
22 intraclass correlation coefficient (ICC; type [C,k]: multiple raters, two-way random effects, consistency)<sup>89</sup>  
23 was computed to assess inter-rater reliability for each feature. Given the high consistency across raters for  
24 all three features (Fig. 1A), we used the mean of these values across the 3 raters to derive singular estimates  
25 of speech impairment for each feature in every patient.

26  
27

## 28 *Magnetoencephalography Data Collection, Preprocessing & Analysis*

29

30 Eyes-open resting-state MEG data were collected from each participant using a 275-channel whole-head  
31 CTF system (Port Coquitlam, British Columbia, Canada) at a sampling rate of 2400 Hz and with an  
32 antialiasing filter with a 600 Hz cut-off. Noise-cancellation was applied using CTF's software-based built-in  
33 third-order spatial gradient noise filters. Recordings lasted a minimum of 5 min<sup>90</sup> and were conducted with  
34 participants in the seated position as they fixated on a centrally-presented crosshair. Participants were  
35 monitored during data acquisition via real-time audio-video feeds from inside the shielded room, and  
36 continuous head position was recorded for each session.

37

38 MEG preprocessing was performed in *Brainstorm*<sup>91</sup> unless otherwise specified, with default parameters  
39 and following good-practice guidelines<sup>92</sup>. The data were bandpass filtered between 1–200 Hz to reduce  
40 slow-wave drift and high-frequency noise, and notch filters were applied at the line-in frequency and  
41 harmonics (i.e., 60, 120 & 180 Hz). Signal space projectors (SSPs) were derived around cardiac and eye-  
42 blink events detected from ECG and EOG channels using the automated procedure available in  
43 *Brainstorm*<sup>93</sup>, reviewed and manually-corrected where necessary, and applied to the data. Additional SSPs  
44 were also used to attenuate highly-stereotyped artifacts on an individual basis. Artifact-reduced MEG data  
45 were then arbitrarily epoched into non-overlapping 6 second blocks and downsampled to 600 Hz. Data  
46 segments still containing major artifacts (e.g., SQUID jumps) were excluded within each session using the  
47 union of two standardized thresholds of  $\pm 3$  median absolute deviations from the median: one for signal  
48 amplitude and one for gradient. An average of 79.19 (SD = 14.68) epochs were used for further analysis

1 (patients: 84.07 [SD = 7.78]; controls: 74.77 [SD = 17.82]). Empty-room recordings lasting at least 2 minutes  
2 were collected on or near the same day as the data recordings and were processed using the same pipeline,  
3 with the exception of the artifact SSPs, to model environmental noise statistics for source analysis.

4  
5 MEG data were coregistered to each individual's segmented T1-weighted MRI (Freesurfer *recon-all*)<sup>94</sup> using  
6 approximately 100 digitized head points. For participants without useable MRI data (N = 11 patients with  
7 PD), a quasi-individualized anatomy was created and coregistered to the MEG data by warping the default  
8 Freesurfer anatomy to the head digitization points and anatomical landmarks for that participant<sup>95</sup>. Source  
9 imaging was performed per epoch using individually-fitted overlapping-spheres forward models (15,000  
10 vertices, with current flows unconstrained to the cortical surface's normal direction) and dynamic statistical  
11 parametric mapping (dSPM). Noise covariance estimated from the previously-mentioned empty-room  
12 recordings were included in the computation of the dSPM maps.

13  
14 Inspired by previously-developed measures of multi-spectral neurophysiological signal pathology<sup>96,97</sup> and  
15 cortical morphometric similarity in clinical populations<sup>98,99</sup>, we developed a new metric of  
16 neurophysiological spectral pathology derived from time-resolved MEG source maps: the Spectral  
17 Deviation Index (SDI; Fig. 2A). We computed vertex-wise estimates of power spectral density from the  
18 source-imaged MEG data using Welch's method (3 s time window, 50% overlap), which we then averaged  
19 over canonical frequency bands (delta: 2–4 Hz; theta: 5–7 Hz; alpha: 8–12 Hz; beta: 15–29 Hz)<sup>93</sup>, and over  
20 all artifact-free 6-second epochs for each participant. The root-mean-square (RMS) norm of PSD across the  
21 three unconstrained orientations at each vertex location and for each participant was then projected onto  
22 a template cortical surface (*FSAverage*) for comparison across participants. For each PD participant, the  
23 resulting PSD map of spectrally-resolved estimates of neural power was correlated across frequencies (i.e.,  
24 delta, theta, alpha and beta) at every spatial location (i.e., vertex) with the comparable estimates from each  
25 control participant. We generated for each patient the linearly-scaled SDI metric of spectral deviations per  
26 vertex by deriving the median of the resulting Pearson coefficients (*r*) across correlations with all control  
27 participants, normalizing these values using the Fisher transform (i.e., the inverse hyperbolic tangent; using  
28 the *atanh* function in Matlab), and subtracting them from 1 to generate a linearly-scaled metric of spectral  
29 deviation (i.e., higher values indicate greater functional neural pathology).

30  
31 In addition to deriving individual SDI maps, we also used the source-imaged MEG data to investigate  
32 patterns of connectivity that relate to speech impairments in patients with PD. We extracted the first  
33 principal component from the three elementary source time series at each vertex location in each  
34 participant's native space, and derived whole-cortex functional connectivity maps, using the peak vertex  
35 identified in our spatially-resolved SDI statistical analysis (back-transformed into each participant's native  
36 space) as the seed. We used orthogonalized amplitude envelope correlations (AEC)<sup>100,101</sup> as the connectivity  
37 measure, based on the same frequency definitions used for the SDI mapping. We estimated connectivity  
38 over each epoch and averaged the resulting AEC estimates across epochs, yielding a single AEC map per  
39 participant and frequency band. We projected these individual AEC maps onto the same template cortical  
40 surface (*FSAverage*) for group analyses.

41  
42 Finally, we extracted several metrics to test for potential confounds of our primary effects of interest. To  
43 test whether our findings were mediated by local neurodegeneration, we estimated cortical thickness with  
44 the *recon-all* pipeline in *Freesurfer*<sup>94</sup> and extracted values at the peak vertex of each significant statistical  
45 cluster for inclusion as nuisance covariates in post-hoc models. To determine whether SDI effects were  
46 related to shifts of the aperiodic broadband component of neural spectra, we processed PSDs with  
47 *specparam* (*Brainstorm* MATLAB version; frequency range = 2–40 Hz; Gaussian peak model; peak width  
48 limits = 0.5 –12 Hz; maximum n peaks = 3; minimum peak height = 3 dB; proximity threshold = 2 standard

1 deviations of the largest peak; fixed aperiodic; no guess weight)<sup>102</sup> to estimate the slope of aperiodic neural  
2 spectral components. We also investigated possible confound effects due to participant head motion, eye  
3 movements, and heart-rate variability: we extracted the RMS of signals from the head position indicators,  
4 EOG, and ECG channels, respectively. Alongside age, these derivations were included in *post hoc* statistical  
5 models to examine the robustness of the initial effect(s) of interest against these potential confounds.

## 6 7 *Statistical Analyses*

8  
9 We assessed relationships between continuous variables using the *lm* function in *R*<sup>103</sup>, with a significance  
10 threshold of  $p < .05$ . Model comparisons were performed using the Akaike information criterion (AIC), with  
11 differences in AIC ( $\Delta$ AIC) between tested models of  $\Delta$ AIC  $> 2$  considered as meaningful<sup>104</sup>. Where  
12 appropriate<sup>105</sup>, we performed mediation analyses using a non-parametric bootstrapping approach for  
13 indirect effects with 10,000 simulations<sup>106</sup>. All statistical models included age as a nuisance covariate.  
14 Participants with missing data were excluded pairwise per model.

15  
16 We performed statistical comparisons using spatially-resolved neural data, covarying out the effect of age,  
17 using *SPM12*. Initial tests used parametric general linear models to investigate relationships with speech  
18 impairment ratings (i.e., multiple regression with voice, prosody, and articulation impairment ratings as  
19 predictors), beyond the effects of age. Contrasts for each speech feature were thus corrected for age and  
20 independent of the other features. We used Threshold-Free Cluster Enhancement (TFCE;  $E = 1.0$ ,  $H = 2.0$ ;  
21 5,000 permutations)<sup>107</sup> to correct the resulting *F*-contrasts for multiple comparisons across vertices. TFCE  
22 avoids the assumptions of parametric modeling, accounts for potential non-uniform spatial autocorrelation  
23 of the data, and avoids the arbitrary selection of cluster-defining thresholds. We applied a final cluster-wise  
24 threshold of  $p_{FWE} < .05$  to determine statistical significance, and used the TFCE clusters at this threshold to  
25 mask the original statistical values (i.e., vertex-wise *F* values) for visualization. We extracted data from the  
26 vertex exhibiting the strongest statistical relationship in each cluster (i.e., the “peak vertex”) for subsequent  
27 analysis and visualization.

28  
29 To determine the relative contribution of individual frequency bands to the significant SDI-speech  
30 relationships, we used an adapted leave-one-out approach. We recomputed SDIs at each peak-vertex four  
31 times – each time excluding data from one frequency band. Speech impairment ratings were then  
32 regressed on these modified SDI values, and we derived the  $\Delta$ AIC between each leave-one-out model and  
33 the original model, with higher values indicating greater contribution to the original effect. Lines-of-best-  
34 fit were also fitted to the data *post hoc* and plotted to display the nature of the underlying relationships  
35 between spectral power and speech ratings for each frequency band.

## 1 Acknowledgements

2 This work was supported by grant F32-NS119375 to AIW from the United States National Institutes of  
3 Health (NIH); to PD from the Richard & Edith Strauss Foundation; to EAF as a Foundation Grant from the  
4 Canadian Institutes of Health Research (CIHR; FDN-154301) and the CIHR Canada Research Chair (Tier 1) of  
5 Parkinson's Disease; to DK from the Healthy Brains for Healthy Lives (HBHL) initiative, the Natural Sciences  
6 and Engineering Research Council of Canada, the Centre for Research on Brain, Language and Music, the  
7 Edith Strauss Foundation, and a private donor; and to SB from by a NSERC Discovery grant, the Healthy  
8 Brains for Healthy Lives initiative of McGill University under the Canada First Research Excellence Fund, the  
9 CIHR Canada Research Chair (Tier 1) of Neural Dynamics of Brain Systems and the NIH (1R01EB026299).  
10 Data collection and sharing for this project was provided by the Quebec Parkinson Network (QPN), the Pre-  
11 symptomatic Evaluation of Novel or Experimental Treatments for Alzheimer's Disease (PREVENT-AD;  
12 release 6.0) program, and the Open MEG Archives (OMEGA). The funders had no role in study design, data  
13 collection and analysis, decision to publish, or preparation of the manuscript.

14 The QPN is funded by a grant from Fonds de recherche du Québec - Santé (FRQS). PREVENT-AD was  
15 launched in 2011 as a \$13.5 million, 7-year public-private partnership using funds provided by McGill  
16 University, the FRQS, an unrestricted research grant from Pfizer Canada, the Levesque Foundation, the  
17 Douglas Hospital Research Centre and Foundation, the Government of Canada, and the Canada Fund for  
18 Innovation. Private sector contributions are facilitated by the Development Office of the McGill University  
19 Faculty of Medicine and by the Douglas Hospital Research Centre Foundation (<http://www.douglas.qc.ca/>).  
20 OMEGA and the Brainstorm app are supported by funding to SB from the NIH (R01-EB026299), a Discovery  
21 grant from the Natural Science and Engineering Research Council of Canada (436355-13), the CIHR Canada  
22 research Chair in Neural Dynamics of Brain Systems, the Brain Canada Foundation with support from Health  
23 Canada, and the Innovative Ideas program from the Canada First Research Excellence Fund, awarded to  
24 McGill University for the HBHL initiative.

## References

- 1 Feigin, V. L. *et al.* Global, regional, and national burden of neurological disorders, 1990–2016: a systematic analysis for the Global Burden of Disease Study 2016. *The Lancet Neurology* **18**, 459-480 (2019).
- 2 Polychronis, S., Niccolini, F., Pagano, G., Yousaf, T. & Politis, M. Speech difficulties in early de novo patients with Parkinson's disease. *Parkinsonism & related disorders* **64**, 256-261 (2019).
- 3 Becker, G. *et al.* Early diagnosis of Parkinson's disease. *Journal of neurology* **249**, iii40-iii48 (2002).
- 4 Rusz, J., Cmejla, R., Ruzickova, H. & Ruzicka, E. Quantitative acoustic measurements for characterization of speech and voice disorders in early untreated Parkinson's disease. *The journal of the Acoustical Society of America* **129**, 350-367 (2011).
- 5 Ramig, L. O., Fox, C. & Sapir, S. Speech treatment for Parkinson's disease. *Expert Review of Neurotherapeutics* **8**, 297-309 (2008).
- 6 Lam, J. M. & Wodchis, W. P. The relationship of 60 disease diagnoses and 15 conditions to preference-based health-related quality of life in Ontario hospital-based long-term care residents. *Medical care*, 380-387 (2010).
- 7 Smith, K. M. & Caplan, D. N. Communication impairment in Parkinson's disease: Impact of motor and cognitive symptoms on speech and language. *Brain and language* **185**, 38-46 (2018).
- 8 Vásquez-Correa, J. C., Orozco-Aroyave, J., Bocklet, T. & Nöth, E. Towards an automatic evaluation of the dysarthria level of patients with Parkinson's disease. *Journal of communication disorders* **76**, 21-36 (2018).
- 9 Goberman, A. M. & Coelho, C. Acoustic analysis of Parkinsonian speech I: Speech characteristics and L-Dopa therapy. *NeuroRehabilitation* **17**, 237-246 (2002).
- 10 Bayestehtashk, A., Asgari, M., Shafran, I. & McNamers, J. Fully automated assessment of the severity of Parkinson's disease from speech. *Computer speech & language* **29**, 172-185 (2015).
- 11 Whitfield, J. A. & Goberman, A. M. Articulatory–acoustic vowel space: Application to clear speech in individuals with Parkinson's disease. *Journal of communication disorders* **51**, 19-28 (2014).
- 12 Skodda, S., Grönheit, W., Mancinelli, N. & Schlegel, U. Progression of voice and speech impairment in the course of Parkinson's disease: a longitudinal study. *Parkinson's disease* **2013** (2013).
- 13 Smith, C. H. *et al.* Rating the intelligibility of dysarthric speech amongst people with Parkinson's Disease: a comparison of trained and untrained listeners. *Clinical linguistics & phonetics* **33**, 1063-1070 (2019).
- 14 Haneishi, E. Effects of a music therapy voice protocol on speech intelligibility, vocal acoustic measures, and mood of individuals with Parkinson's disease. *Journal of music therapy* **38**, 273-290 (2001).
- 15 Price, C. J. A review and synthesis of the first 20 years of PET and fMRI studies of heard speech, spoken language and reading. *Neuroimage* **62**, 816-847 (2012).
- 16 Klein, D., Milner, B., Zatorre, R. J., Meyer, E. & Evans, A. C. The neural substrates underlying word generation: a bilingual functional-imaging study. *Proceedings of the National Academy of Sciences* **92**, 2899-2903 (1995).
- 17 Hickok, G. & Poeppel, D. The cortical organization of speech processing. *Nature reviews neuroscience* **8**, 393-402 (2007).
- 18 Llorens, A., Trébuchon, A., Liégeois-Chauvel, C. & Alario, F. Intra-cranial recordings of brain activity during language production. *Frontiers in psychology* **2**, 375 (2011).
- 19 Kell, C. A., Morillon, B., Kouneiher, F. & Giraud, A.-L. Lateralization of speech production starts in sensory cortices—a possible sensory origin of cerebral left dominance for speech. *Cerebral Cortex* **21**, 932-937 (2011).



- 1 20 Morillon, B. *et al.* Neurophysiological origin of human brain asymmetry for speech and language.  
2 *Proceedings of the National Academy of Sciences* **107**, 18688-18693 (2010).
- 3 21 Keller, C. & Kell, C. A. Asymmetric intra-and interhemispheric interactions during covert and overt  
4 sentence reading. *Neuropsychologia* **93**, 448-465 (2016).
- 5 22 Indefrey, P. The spatial and temporal signatures of word production components: a critical update.  
6 *Frontiers in psychology* **2**, 255 (2011).
- 7 23 Munding, D., Dubarry, A.-S. & Alario, F.-X. On the cortical dynamics of word production: A review  
8 of the MEG evidence. *Language, Cognition and Neuroscience* **31**, 441-462 (2016).
- 9 24 Long, M. A. *et al.* Functional segregation of cortical regions underlying speech timing and  
10 articulation. *Neuron* **89**, 1187-1193 (2016).
- 11 25 Castellucci, G. A., Kovach, C. K., Howard, M. A., Greenlee, J. D. & Long, M. A. A speech planning  
12 network for interactive language use. *Nature*, 1-6 (2022).
- 13 26 Poeppel, D. & Assaneo, M. F. Speech rhythms and their neural foundations. *Nature Reviews*  
14 *Neuroscience* **21**, 322-334 (2020).
- 15 27 Donhauer, P. W. & Baillet, S. Two distinct neural timescales for predictive speech processing.  
16 *Neuron* **105**, 385-393. e389 (2020).
- 17 28 Gehrig, J., Wibral, M., Arnold, C. & Kell, C. A. Setting up the speech production network: how  
18 oscillations contribute to lateralized information routing. *Frontiers in psychology* **3**, 169 (2012).
- 19 29 Coolen, T. *et al.* Frequency-Dependent Intrinsic Electrophysiological Functional Architecture of the  
20 Human Verbal Language Network. *Frontiers in Integrative Neuroscience* **14**, 27 (2020).
- 21 30 Saarinen, T., Laaksonen, H., Parviainen, T. & Salmelin, R. Motor cortex dynamics in visuomotor  
22 production of speech and non-speech mouth movements. *Cerebral cortex* **16**, 212-222 (2006).
- 23 31 Salmelin, R., Schnitzler, A., Schmitz, F. & Freund, H.-J. Single word reading in developmental  
24 stutterers and fluent speakers. *Brain* **123**, 1184-1202 (2000).
- 25 32 Mersov, A.-M., Jobst, C., Cheyne, D. O. & De Nil, L. Sensorimotor oscillations prior to speech onset  
26 reflect altered motor networks in adults who stutter. *Frontiers in human neuroscience* **10**, 443  
27 (2016).
- 28 33 Jenson, D., Harkrider, A. W., Thornton, D., Bowers, A. L. & Saltuklaroglu, T. Auditory cortical  
29 deactivation during speech production and following speech perception: an EEG investigation of  
30 the temporal dynamics of the auditory alpha rhythm. *Frontiers in human neuroscience* **9**, 534  
31 (2015).
- 32 34 Piai, V., Roelofs, A., Rommers, J., Dahlsätt, K. & Maris, E. Withholding planned speech is reflected  
33 in synchronized beta-band oscillations. *Frontiers in Human Neuroscience* **9**, 549 (2015).
- 34 35 Jenson, D. *et al.* Temporal dynamics of sensorimotor integration in speech perception and  
35 production: independent component analysis of EEG data. *Frontiers in psychology* **5**, 656 (2014).
- 36 36 Bowers, A., Saltuklaroglu, T., Jenson, D., Harkrider, A. & Thornton, D. Power and phase coherence  
37 in sensorimotor mu and temporal lobe alpha components during covert and overt syllable  
38 production. *Experimental brain research* **237**, 705-721 (2019).
- 39 37 Maillet, A. *et al.* Levodopa effects on hand and speech movements in patients with Parkinson's  
40 disease: a fMRI study. (2012).
- 41 38 Pinto, S. *et al.* Subthalamic nucleus stimulation and dysarthria in Parkinson's disease: a PET study.  
42 *Brain* **127**, 602-615 (2004).
- 43 39 Pinto, S. *et al.* Functional magnetic resonance imaging exploration of combined hand and speech  
44 movements in Parkinson's disease. *Movement disorders* **26**, 2212-2219 (2011).
- 45 40 Rektorova, I., Barrett, J., Mikl, M., Rektor, I. & Paus, T. Functional abnormalities in the primary  
46 orofacial sensorimotor cortex during speech in Parkinson's disease. *Movement disorders: official*  
47 *journal of the Movement Disorder Society* **22**, 2043-2051 (2007).

- 1 41 Elfmarková, N. *et al.* Impact of Parkinson's disease and levodopa on resting state functional  
2 connectivity related to speech prosody control. *Parkinsonism & related disorders* **22**, S52-S55  
3 (2016).
- 4 42 Rektorová, I. *et al.* Functional neuroanatomy of vocalization in patients with Parkinson's disease.  
5 *Journal of the neurological sciences* **313**, 7-12 (2012).
- 6 43 Arnold, C., Gehrig, J., Gispert, S., Seifried, C. & Kell, C. A. Pathomechanisms and compensatory  
7 efforts related to Parkinsonian speech. *NeuroImage: Clinical* **4**, 82-97 (2014).
- 8 44 Hebb, A. O., Darvas, F. & Miller, K. J. Transient and state modulation of beta power in human  
9 subthalamic nucleus during speech production and finger movement. *Neuroscience* **202**, 218-233  
10 (2012).
- 11 45 Johari, K. & Behroozmand, R. Neural correlates of speech and limb motor timing deficits revealed  
12 by aberrant beta band desynchronization in Parkinson's disease. *Clinical Neurophysiology* **132**,  
13 2711-2721 (2021).
- 14 46 Oswal, A., Brown, P. & Litvak, V. Synchronized neural oscillations and the pathophysiology of  
15 Parkinson's disease. *Current opinion in neurology* **26**, 662-670 (2013).
- 16 47 Boon, L. I. *et al.* A systematic review of MEG-based studies in Parkinson's disease: The motor system  
17 and beyond. *Human brain mapping* **40**, 2827-2848 (2019).
- 18 48 Heinrichs-Graham, E. *et al.* Neuromagnetic evidence of abnormal movement-related beta  
19 desynchronization in Parkinson's disease. *Cerebral cortex* **24**, 2669-2678 (2014).
- 20 49 Guerra, A. *et al.* Driving motor cortex oscillations modulates bradykinesia in Parkinson's disease.  
21 *Brain* (2021).
- 22 50 Perlmutter, J. S. & Mink, J. W. Deep brain stimulation. *Annu. Rev. Neurosci.* **29**, 229-257 (2006).
- 23 51 Pereira, J. B. *et al.* Modulation of verbal fluency networks by transcranial direct current stimulation  
24 (tDCS) in Parkinson's disease. *Brain stimulation* **6**, 16-24 (2013).
- 25 52 Khan, T., Westin, J. & Dougherty, M. Classification of speech intelligibility in Parkinson's disease.  
26 *Biocybernetics and Biomedical Engineering* **34**, 35-45 (2014).
- 27 53 Levy, E. S. *et al.* The effects of intensive speech treatment on intelligibility in Parkinson's disease: a  
28 randomised controlled trial. *EclinicalMedicine* **24**, 100429 (2020).
- 29 54 Donhauser, P. W. & Klein, D. Audio-Tokens: a toolbox for rating, sorting and comparing audio  
30 samples in the browser. *Behavior Research Methods*, 1-8 (2022).
- 31 55 Mei, J., Desrosiers, C. & Frasnelli, J. Machine learning for the diagnosis of parkinson's disease: A  
32 review of literature. *Frontiers in aging neuroscience* **13**, 184 (2021).
- 33 56 Flinker, A. *et al.* Redefining the role of Broca's area in speech. *Proceedings of the National Academy*  
34 *of Sciences* **112**, 2871-2875 (2015).
- 35 57 Gough, P. M., Nobre, A. C. & Devlin, J. T. Dissociating linguistic processes in the left inferior frontal  
36 cortex with transcranial magnetic stimulation. *Journal of Neuroscience* **25**, 8010-8016 (2005).
- 37 58 Amunts, K. *et al.* Analysis of neural mechanisms underlying verbal fluency in cytoarchitectonically  
38 defined stereotaxic space—the roles of Brodmann areas 44 and 45. *NeuroImage* **22**, 42-56 (2004).
- 39 59 Heim, S. *et al.* The role of the left Brodmann's areas 44 and 45 in reading words and pseudowords.  
40 *Cognitive Brain Research* **25**, 982-993 (2005).
- 41 60 Doelling, K. B., Arnal, L. H., Ghitza, O. & Poeppel, D. Acoustic landmarks drive delta–theta  
42 oscillations to enable speech comprehension by facilitating perceptual parsing. *NeuroImage* **85**,  
43 761-768 (2014).
- 44 61 Daume, J., Wang, P., Maye, A., Zhang, D. & Engel, A. K. Non-rhythmic temporal prediction involves  
45 phase resets of low-frequency delta oscillations. *NeuroImage* **224**, 117376 (2021).
- 46 62 Herbst, S. K. & Obleser, J. Implicit temporal predictability enhances pitch discrimination sensitivity  
47 and biases the phase of delta oscillations in auditory cortex. *NeuroImage* **203**, 116198 (2019).

1 63 Meehan, C. E. *et al.* Differences in Rhythmic Neural Activity Supporting the Temporal and Spatial  
2 Cueing of Attention. *Cerebral Cortex* (2021).

3 64 Wiesman, A. I., Groff, B. R. & Wilson, T. W. Frontoparietal Networks Mediate the Behavioral Impact  
4 of Alpha Inhibition in Visual Cortex. *Cereb Cortex*, doi:10.1093/cercor/bhy220 (2018).

5 65 Jensen, O. & Mazaheri, A. Shaping functional architecture by oscillatory alpha activity: gating by  
6 inhibition. *Front Hum Neurosci* **4**, 186, doi:10.3389/fnhum.2010.00186 (2010).

7 66 Haegens, S., Luther, L. & Jensen, O. Somatosensory anticipatory alpha activity increases to suppress  
8 distracting input. *J Cogn Neurosci* **24**, 677-685, doi:10.1162/jocn\_a\_00164 (2012).

9 67 Haegens, S., Händel, B. F. & Jensen, O. Top-down controlled alpha band activity in somatosensory  
10 areas determines behavioral performance in a discrimination task. *J Neurosci* **31**, 5197-5204,  
11 doi:10.1523/JNEUROSCI.5199-10.2011 (2011).

12 68 Heinrichs-Graham, E. & Wilson, T. W. Is an absolute level of cortical beta suppression required for  
13 proper movement? Magnetoencephalographic evidence from healthy aging. *Neuroimage* **134**,  
14 514-521, doi:10.1016/j.neuroimage.2016.04.032 (2016).

15 69 Cao, Y., Oostenveld, R., Alday, P. M. & Piai, V. Are alpha and beta oscillations spatially dissociated  
16 over the cortex in context-driven spoken-word production? *Psychophysiology*, e13999 (2022).

17 70 Piai, V., Roelofs, A., Rommers, J. & Maris, E. Beta oscillations reflect memory and motor aspects of  
18 spoken word production. *Human brain mapping* **36**, 2767-2780 (2015).

19 71 Florin, E. & Baillet, S. The brain's resting-state activity is shaped by synchronized cross-frequency  
20 coupling of neural oscillations. *Neuroimage* **111**, 26-35 (2015).

21 72 Briggs, R. G. *et al.* Anatomy and white matter connections of the inferior frontal gyrus. *Clinical*  
22 *Anatomy* **32**, 546-556 (2019).

23 73 Hyder, R. *et al.* Functional connectivity of spoken language processing in early-stage Parkinson's  
24 disease: An MEG study. *NeuroImage: Clinical* **32**, 102718 (2021).

25 74 Abrevaya, S. *et al.* The road less traveled: alternative pathways for action-verb processing in  
26 Parkinson's disease. *Journal of Alzheimer's Disease* **55**, 1429-1435 (2017).

27 75 Stoffers, D., Bosboom, J. L., Wolters, E. C., Stam, C. J. & Berendse, H. W. Dopaminergic modulation  
28 of cortico-cortical functional connectivity in Parkinson's disease: an MEG study. *Experimental*  
29 *neurology* **213**, 191-195 (2008).

30 76 Stoffers, D. *et al.* Increased cortico-cortical functional connectivity in early-stage Parkinson's  
31 disease: an MEG study. *Neuroimage* **41**, 212-222 (2008).

32 77 Litvak, V. *et al.* Resting oscillatory cortico-subthalamic connectivity in patients with Parkinson's  
33 disease. *Brain* **134**, 359-374 (2011).

34 78 Boon, L. I. *et al.* Motor effects of deep brain stimulation correlate with increased functional  
35 connectivity in Parkinson's disease: An MEG study. *NeuroImage: Clinical* **26**, 102225 (2020).

36 79 Pollok, B. *et al.* Increased SMA-M1 coherence in Parkinson's disease—Pathophysiology or  
37 compensation? *Experimental Neurology* **247**, 178-181 (2013).

38 80 Hirschmann, J. *et al.* Differential modulation of STN-cortical and cortico-muscular coherence by  
39 movement and levodopa in Parkinson's disease. *Neuroimage* **68**, 203-213 (2013).

40 81 Gan-Or, Z. *et al.* The Quebec Parkinson network: a researcher-patient matching platform and  
41 multimodal biorepository. *Journal of Parkinson's disease* **10**, 301-313 (2020).

42 82 Goetz, C. G. *et al.* Movement Disorder Society-sponsored revision of the Unified Parkinson's  
43 Disease Rating Scale (MDS-UPDRS): scale presentation and clinimetric testing results. *Movement*  
44 *disorders: official journal of the Movement Disorder Society* **23**, 2129-2170 (2008).

45 83 Nasreddine, Z. S. *et al.* The Montreal Cognitive Assessment, MoCA: a brief screening tool for mild  
46 cognitive impairment. *J Am Geriatr Soc* **53**, 695-699, doi:10.1111/j.1532-5415.2005.53221.x  
47 (2005).

1 84 Tremblay-Mercier, J. *et al.* Open Science Datasets from PREVENT-AD, a Longitudinal Cohort of Pre-  
2 symptomatic Alzheimer's Disease. *NeuroImage: Clinical*, 102733 (2021).  
3 85 Niso, G. *et al.* OMEGA: the open MEG archive. *Neuroimage* **124**, 1182-1187 (2016).  
4 86 Sandoval, S., Berisha, V., Utianski, R. L., Liss, J. M. & Spanias, A. Automatic assessment of vowel  
5 space area. *The Journal of the Acoustical Society of America* **134**, EL477-EL483 (2013).  
6 87 Boersma, P. Praat, a system for doing phonetics by computer. *Glott. Int.* **5**, 341-345 (2001).  
7 88 Jadoul, Y., Thompson, B. & De Boer, B. Introducing parselmouth: A python interface to praat.  
8 *Journal of Phonetics* **71**, 1-15 (2018).  
9 89 Koo, T. K. & Li, M. Y. A guideline of selecting and reporting intraclass correlation coefficients for  
10 reliability research. *Journal of chiropractic medicine* **15**, 155-163 (2016).  
11 90 Wiesman, A. I., da Silva Castanheira, J. & Baillet, S. Stability of spectral estimates in resting-state  
12 magnetoencephalography: Recommendations for minimal data duration with neuroanatomical  
13 specificity. *Neuroimage* **247**, 118823, doi:10.1016/j.neuroimage.2021.118823 (2022).  
14 91 Tadel, F., Baillet, S., Mosher, J. C., Pantazis, D. & Leahy, R. M. Brainstorm: a user-friendly application  
15 for MEG/EEG analysis. *Computational intelligence and neuroscience* **2011** (2011).  
16 92 Gross, J. *et al.* Good practice for conducting and reporting MEG research. *Neuroimage* **65**, 349-363  
17 (2013).  
18 93 Niso, G. *et al.* Brainstorm pipeline analysis of resting-state data from the open MEG archive.  
19 *Frontiers in neuroscience* **13**, 284 (2019).  
20 94 Fischl, B. FreeSurfer. *Neuroimage* **62**, 774-781 (2012).  
21 95 Tadel, F. *et al.* MEG/EEG group analysis with brainstorm. *Frontiers in neuroscience* **13**, 76 (2019).  
22 96 Baillet, S. Magnetoencephalography for brain electrophysiology and imaging. *Nature neuroscience*  
23 **20**, 327 (2017).  
24 97 Wiesman, A. I. *et al.* Spatially resolved neural slowing predicts impairment and amyloid burden in  
25 Alzheimer's disease. *Brain*, doi:10.1093/brain/awab430 (2022).  
26 98 Doucet, G. E. *et al.* Personalized estimates of morphometric similarity in bipolar disorder and  
27 schizophrenia. *npj Schizophrenia* **6**, 1-7 (2020).  
28 99 Doucet, G. E., Glahn, D. C. & Frangou, S. Person-based similarity in brain structure and functional  
29 connectivity in bipolar disorder. *Journal of Affective Disorders* **276**, 38-44 (2020).  
30 100 Bruns, A., Eckhorn, R., Jokeit, H. & Ebner, A. Amplitude envelope correlation detects coupling  
31 among incoherent brain signals. *Neuroreport* **11**, 1509-1514 (2000).  
32 101 Colclough, G. L., Brookes, M. J., Smith, S. M. & Woolrich, M. W. A symmetric multivariate leakage  
33 correction for MEG connectomes. *Neuroimage* **117**, 439-448 (2015).  
34 102 Donoghue, T. *et al.* Parameterizing neural power spectra into periodic and aperiodic components.  
35 *Nature neuroscience* **23**, 1655-1665 (2020).  
36 103 Team, R. C. (R Foundation for Statistical Computing, Vienna, Austria, 2017).  
37 104 Burnham, K. P. & Anderson, D. R. in *Model selection and inference* 75-117 (Springer, 1998).  
38 105 Baron, R. M. & Kenny, D. A. The moderator-mediator variable distinction in social psychological  
39 research: conceptual, strategic, and statistical considerations. *J Pers Soc Psychol* **51**, 1173-1182  
40 (1986).  
41 106 Tingley, D., Yamamoto, T., Hirose, K., Keele, L. & Imai, K. mediation: R Package for Causal Mediation  
42 Analysis. *Journal of Statistical Software* **59**, 1-38 (2014).  
43 107 Smith, S. M. & Nichols, T. E. Threshold-free cluster enhancement: addressing problems of  
44 smoothing, threshold dependence and localisation in cluster inference. *Neuroimage* **44**, 83-98  
45 (2009).

46  
47

## 1 Figure Legends

2  
3 **Figure 1. Speech impairment ratings are reliable and predicted by clinical features of PD.** (A) Graphical user  
4 interface for the manual rating of speech feature impairments using *Audio-Tokens*. When hovered-over with the  
5 mouse, colored circles play speech samples from separate patients with Parkinson's disease, allowing for  
6 interactive and comparative rating (i.e., by clicking and sliding the circles horizontally) of impairments in each  
7 speech feature. Intraclass correlation coefficients (ICC) indicate reliability of speech ratings across three  
8 independent raters. (B) Significant linear relationships between voice, articulation, and prosody impairments  
9 and two common clinical scales in Parkinson's disease: the Unified Parkinson's Disease Rating Scale part III (i.e.,  
10 UPDRS-III, minus speech sub-scores) and the Montreal Cognitive Assessment (MoCA). All models controlled for  
11 age. Shaded intervals represent the 95% confidence interval.

12  
13 **Figure 2. The Spectral Deviation Index (SDI).** (A) For all participants, magnetoencephalography (MEG) data were  
14 cortically mapped, frequency-transformed, and averaged over canonical frequency bands (i.e.,  $\delta$ : 2 – 4 Hz;  $\theta$ : 4  
15 – 7 Hz;  $\delta$ : 8 – 12 Hz;  $\beta$ : 15 – 29 Hz). Pearson correlation coefficients were then estimated at each vertex,  
16 representing the similarity in frequency-wise power between each patient and control. For each patient, the  
17 median of these values was taken over all comparisons to control participants, which was then Fisher-  
18 transformed to ensure linear scaling (i.e., transformed with the inverse hyperbolic tangent function) and  
19 subtracted from 1 to indicate relative deviations from the control group. Surface maps below indicate the mean  
20 (B) and standard deviation (C) of the spectral deviation maps across all patients with Parkinson's disease.

21  
22 **Figure 3. Spectral deviation predicts articulatory impairments in the left inferior frontal cortex.** (A) Surface maps  
23 indicate a significant relationship between spectral deviations and articulation impairments in patients with  
24 Parkinson's disease (PD), with spectral deviations (SDI) and articulation impairment ratings from the peak vertex  
25 of this relationship plotted in (B). (C) Model contribution values shown in the donut plot indicate comparisons  
26 between models predicting articulation impairment ratings using the SDI values from the same peak vertex and  
27 comparable SDI values computed with each frequency left out once. More positive differences in Akaike  
28 information criterion ( $\Delta$ AIC) indicate a stronger contribution of that frequency to the overall model, with  $\Delta$ AIC >  
29 2 signifying meaningful differences in model information. Best fit lines represent the linear relationships  
30 between these leave-one-out models for each frequency and the articulation impairment ratings across patients  
31 with PD. (D) Lines-of-best-fit indicate the direction of the underlying relationships between spectral power at  
32 each frequency and articulation impairment ratings. All models controlled for age. Shaded intervals represent  
33 the 95% confidence interval.

34  
35 **Figure 4.  $\beta$ -frequency functional connectivity between left inferior frontal cortex and somatomotor regions  
36 mediates the impact of cognitive decline on articulation impairments.** (A) Surface maps indicate a significant  
37 relationship between articulation impairment ratings and frequency-resolved functional connectivity, computed  
38 using orthogonalized amplitude envelope correlations (AEC) with the peak vertex of the relationship from Figure  
39 3 as the seed. (B)  $\beta$ -connectivity and articulation impairments from the peak vertex of this relationship are  
40 plotted on the left, and the relationship between the same  $\beta$ -connectivity values and cognitive function (i.e.,  
41 Montreal Cognitive Assessment [MoCA] scores) plotted on the right. (C) Paths between MoCA scores,  
42 articulation impairment ratings, and  $\beta$ -connectivity values to the left indicate partial correlations ( $r$ ) between  
43 each set of variables. The correlation value in parentheses represents the mediated relationship between MoCA  
44 scores and articulation impairment ratings when accounting for  $\beta$ -connectivity. The total effect, average direct  
45 effect (ADE), and average causal mediation effect (ACME; i.e., indirect effect) are plotted with 95% confidence  
46 intervals to the right. All models controlled for age. Shaded intervals represent the 95% confidence interval. **\*\*** $p$   
47 < .01, **\*** $p$  < .05.

**Table 1.** Between-group demographic comparisons and patient group clinical profile.

|                      | Age<br>(years) | Sex<br>(% female) | Handedness<br>(# left/ambi)     | Education<br>(years)        |                               |                                     |
|----------------------|----------------|-------------------|---------------------------------|-----------------------------|-------------------------------|-------------------------------------|
| HC                   | 63.02 (8.13)   | 65                | 3/3                             | 15.85                       |                               |                                     |
| PD                   | 65.95 (8.14)   | 71                | 4/3                             | 15.14                       |                               |                                     |
| <i>p</i>             | .067           | .434              | .863                            | .615                        |                               |                                     |
|                      | MoCA           | UPDRS-III         | UPDRS-III<br>Speech<br>(N = 54) | Hoehn &<br>Yahr<br>(N = 48) | Years Since<br>Dx<br>(N = 56) | % Taking<br>DA Agonists<br>(N = 53) |
| PD                   |                |                   |                                 |                             |                               |                                     |
| <b>Range</b>         | 12 – 30        | 7 – 71            | 0 – 3                           | 1 – 3                       | 1 – 25                        | -                                   |
| <b>Mean<br/>(SD)</b> | 24.44 (3.99)   | 32.68 (14.77)     | 1.35 (0.83)                     | 1.96 (0.70)                 | 6.66 (4.74)                   | 28.81                               |

HC: healthy control group; PD: Parkinson’s disease group; MoCA: Montreal Cognitive Assessment; UPDRS-III: Unified Parkinson’s Disease Rating Scale part III; Dx: Diagnosis; DA: Dopamine. Unless otherwise indicated, values indicate means and associated parentheses indicate standard deviations. HC sample N = 65, PD sample N = 59, unless otherwise indicated. P-values indicate significance of between-groups Mann-Whitney U tests and chi-square tests for continuous and categorical variables, respectively.
